# Supplementary material
Source: publisher figshare collection journal article supplement (https://geolsoc.figshare.com/ndownloader/files/35156108)
Supplement: Supplementary file 1 [file 35156108]

## Sheet: Sheet1
Results_export_1	Results_export_2	Results_export_3
Results of Monte Carlo unmixing model
wghtings applied to PDPs and CDFs
number of grains in each trial=	N/A
trials=	10000
percent accepted trials=	1
Cross-correlation cutoff=	0
Kuiper V value cutoff=	1
KS D value cutoff=	1
Cross-correlation	0.855 +/- 0.009				Total Percentage Contribution
Sample Names	Relative Contribution	Standard Deviation	Percent		Coahuila	Maya
McManus	0.144365	0.126932			33.6	52
PC03/Coahuila	0.270829	0.101898	27.1
La Joya/Coahuila	0.0651973	0.0562349	6.5
Baldy Granites/Maya	0.0620623	0.0392361	6.2
Baldy Seds/Maya	0.110588	0.0669589	11.1
Chicxulub/Maya	0.11374	0.0344018	11.4
Macal Granites/Maya	0.053838	0.0404348	5.4
Santa Rosa/Maya	0.17938	0.070463	17.9
Kuiper V value	0.048 +/- 0.003
Sample Names	Relative Contribution	Standard Deviation			Coahuila	Maya
McManus	0.359044	0.263723	35.9		24.8	39.3
PC03/Coahuila	0.152862	0.120838	15.3
La Joya/Coahuila	0.0946425	0.0840506	9.5
Baldy Granites/Maya	0.0488509	0.0355086	4.9
Baldy Seds/Maya	0.0977945	0.0668604	9.8
Chicxulub/Maya	0.0623162	0.0380001	6.2
Macal Granites/Maya	0.0492579	0.036666	4.9
Santa Rosa/Maya	0.135232	0.0865904	13.5
KS D value	0.083 +/- 0.005
Sample Names	Relative Contribution	Standard Deviation
McManus	0.415361	0.269047
PC03/Coahuila	0.122369	0.111653
La Joya/Coahuila	0.0966552	0.0830248
Baldy Granites/Maya	0.0526537	0.0364712
Baldy Seds/Maya	0.086837	0.06775
Chicxulub/Maya	0.0668896	0.0396548
Macal Granites/Maya	0.044362	0.0361193
Santa Rosa/Maya	0.114872	0.0887285
